# Supplementary material for: Exploring Patients' Views of a Cognitive Behavioral Therapy-Based Website for the Self-Management of Irritable Bowel Syndrome Symptoms
Source: J Med Internet Res. 2013 Sep 3;15(9):e190. doi: 10.2196/jmir.2672 (PMC3785978; doi:10.2196/jmir.2672)

## Session 2: Assessing your symptoms

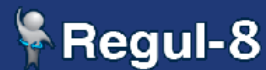

An 8 Session Self Management Programme  
for Irritable Bowel Syndrome (IBS)

[Home](#)[My Sessions](#)[My Tasks](#)

sessions

### 5) Your Personal Model

Let's begin looking at your behaviours.

Below is a list of behaviours that might be familiar to you. If you do the behaviour, click the button. If none of these behaviours seem familiar you can write your own by selecting option 9.

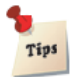

Tip

**Note that you can only choose a maximum of three behaviours**

- |                                                                    |                                     |
|--------------------------------------------------------------------|-------------------------------------|
| 1. I skip meals when I have symptoms                               | <input type="checkbox"/>            |
| 2. I avoid exercise when I have symptoms                           | <input type="checkbox"/>            |
| 3. I avoid social events                                           | <input checked="" type="checkbox"/> |
| 4. I check for toilets as soon as I arrive somewhere new           | <input type="checkbox"/>            |
| 5. I spend a long time on the toilet straining if I am constipated | <input type="checkbox"/>            |
| 6. I check stools after I have been to the toilet                  | <input type="checkbox"/>            |
| 7. I often change what I eat in response to my symptoms            | <input type="checkbox"/>            |
| 8. None of these behaviours apply to me                            | <input type="checkbox"/>            |
| 9. I want to write my own behaviour                                | <input type="checkbox"/>            |

[Back](#)[Next](#)

## Session 2: Assessing your symptoms

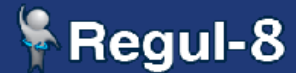

An 8 Session Self Management Programme  
for Irritable Bowel Syndrome (IBS)

[Home](#)[My Sessions](#)[My Tasks](#)

### 5) Your Personal Model

Select any thoughts that are related to that behaviour or write your own. **Note that you can only choose a maximum of 2 thoughts**

| Behaviour                 | Associated thought                                                                                                                                                                                                                                                                                                                                                                                                                        |
|---------------------------|-------------------------------------------------------------------------------------------------------------------------------------------------------------------------------------------------------------------------------------------------------------------------------------------------------------------------------------------------------------------------------------------------------------------------------------------|
| 3. I avoid social events. | <div>1. If I go out I might have an accident. <input type="checkbox"/></div> <div>2. People might overhear me if I go to the toilet <input type="checkbox"/></div> <div>3. I might not know where the toilets are. <input checked="" type="checkbox"/></div> <div>4. I might pass wind in public. <input type="checkbox"/></div> <div>5. I might not be able to cope if my symptoms are bad when I am out. <input type="checkbox"/></div> |

My own thoughts:

[Back](#)[Next](#)

## Session 2: Assessing your symptoms

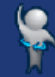

# Regul-8

An 8 Session Self Management Programme  
for Irritable Bowel Syndrome (IBS)

[Home](#)[My Sessions](#)[My Tasks](#)

### 5) Your Personal Model

For your behaviour and thoughts, select any **emotions** that are related to that behaviour or write your own.

| Behaviour                 | Associated thought                         | Associated emotion                                                                                                                                                                                                                                                                                              |
|---------------------------|--------------------------------------------|-----------------------------------------------------------------------------------------------------------------------------------------------------------------------------------------------------------------------------------------------------------------------------------------------------------------|
| 3. I avoid social events. | 3. I might not know where the toilets are. | 1. Depressed <input checked="" type="checkbox"/><br>2. Sad <input checked="" type="checkbox"/><br>3. Anxious <input type="checkbox"/><br>4. Embarrassed <input checked="" type="checkbox"/><br>5. Worried <input type="checkbox"/><br>6. Scared <input type="checkbox"/><br>7. Ashamed <input type="checkbox"/> |

My own emotion:

[Back](#)[Next](#)

## 5) Your Personal Model

Here is your personal model showing the links between your behaviours, thoughts and emotions. We will focus on each of these over the course of the programme.

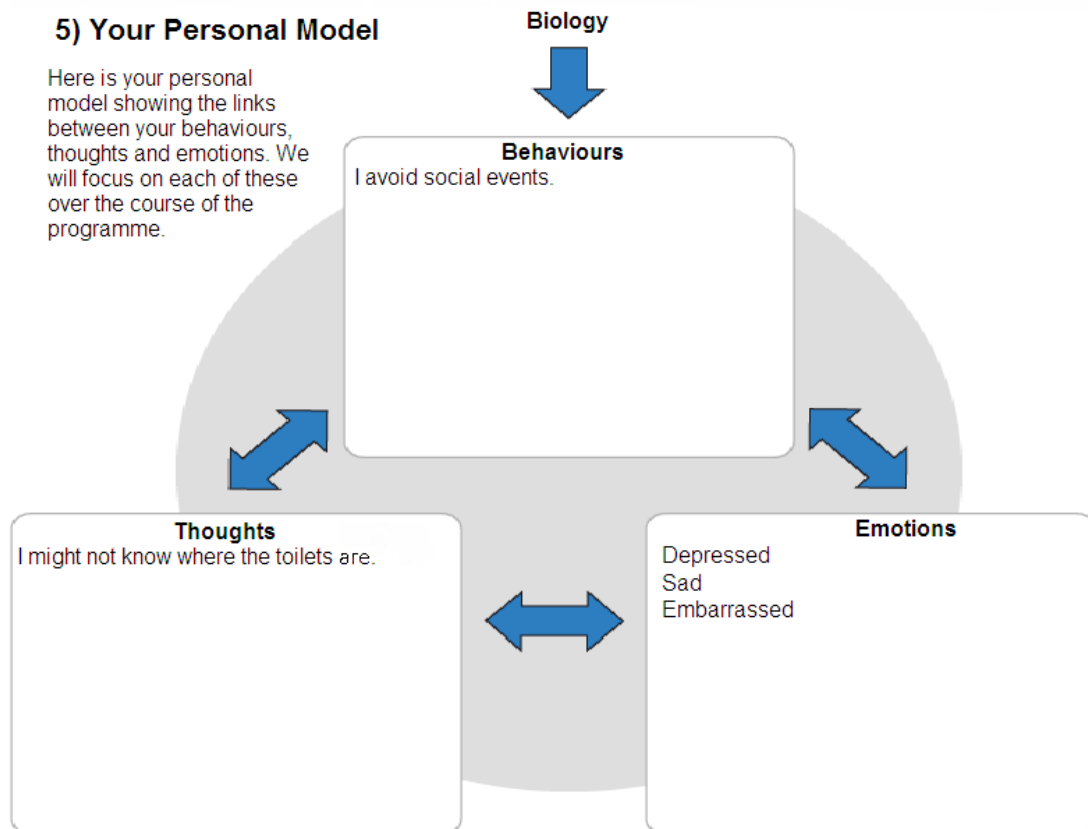

Supplement: Supplementary file 2 [file jmir_v15i9e190_app2.pdf]
